# Supplementary material
Source: publisher figshare collection journal article supplement (https://acs.figshare.com/ndownloader/files/18105377)
Supplement: Supplementary file 1 [file 18105377]

## **Supporting Information**

# Sustaining Enhanced Electrical Conductivity in KAuBr<sub>4</sub>-Doped Carbon Nanotube Wires at High Current Densities

*Karen J. Soule<sup>1,2</sup>, Colleen C. Lawlor<sup>1,3,\*</sup>, Andrew R. Bucossi<sup>1,4</sup>, Cory D. Cress<sup>5</sup>, Ivan Puchades<sup>1,6</sup>, and Brian J. Landi<sup>\*,1,3</sup>*

<sup>1</sup>NanoPower Research Laboratories, Rochester Institute of Technology, Rochester, New York, 14623, United States

<sup>2</sup>Engineering PhD, Rochester Institute of Technology, Rochester, New York, 14623, United States

<sup>3</sup>Department of Chemical Engineering, Rochester Institute of Technology, Rochester, New York, 14623, United States

<sup>4</sup>Department of Microsystems Engineering, Rochester Institute of Technology, Rochester, New York, 14623, United States

<sup>5</sup>Electronics Science & Technology Division, U.S. Naval Research Laboratory, Washington, DC, 20375, United States

<sup>6</sup>Department of Electrical Engineering, Rochester Institute of Technology, Rochester, New York, 14623, United States

\*E-mail: [brian.landi@rit.edu](mailto:brian.landi@rit.edu)

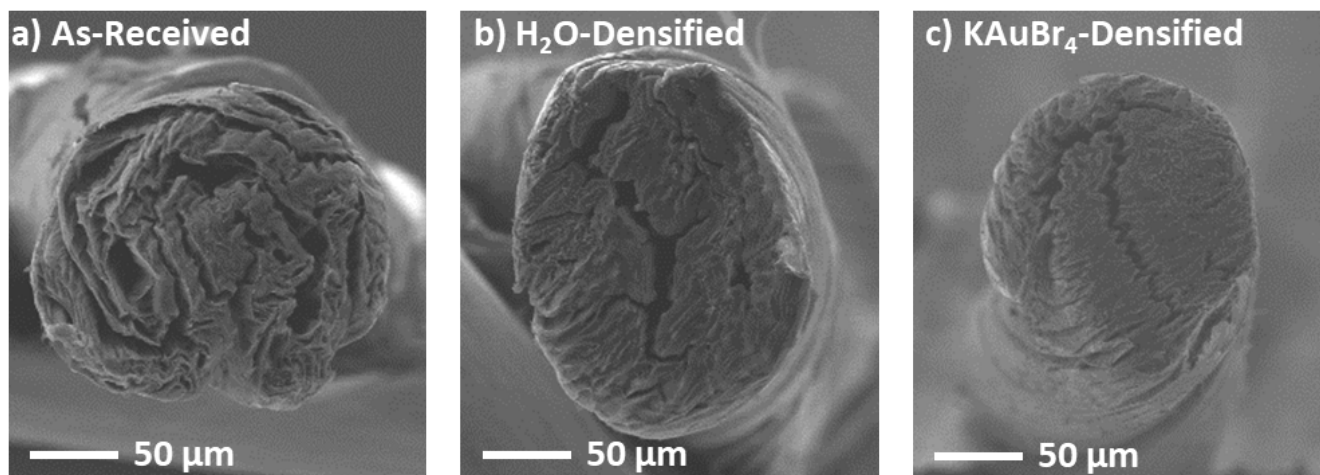

Figure S1: Cross-section SEMs of as-received,  $\text{H}_2\text{O}$ -densified, and  $\text{KAuBr}_4$ -densified CNT yarns.

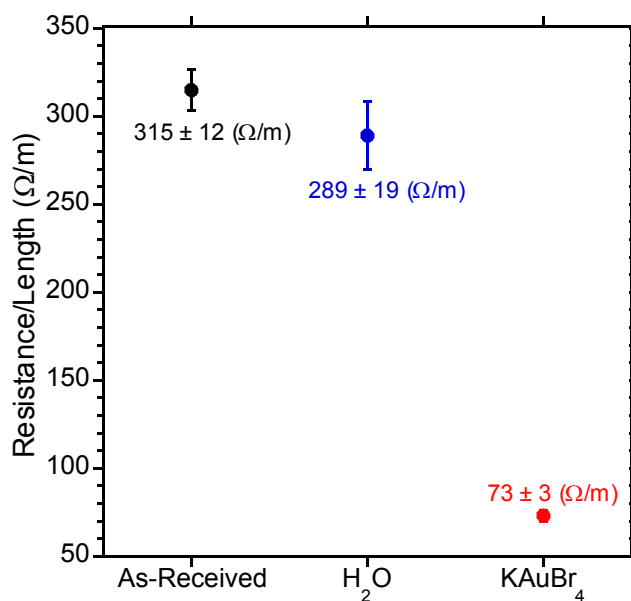

Figure S2: Resistance per length measurements taken at room temperature indicating the different charge transport properties of the CNT yarns, independent of changes in diameter.

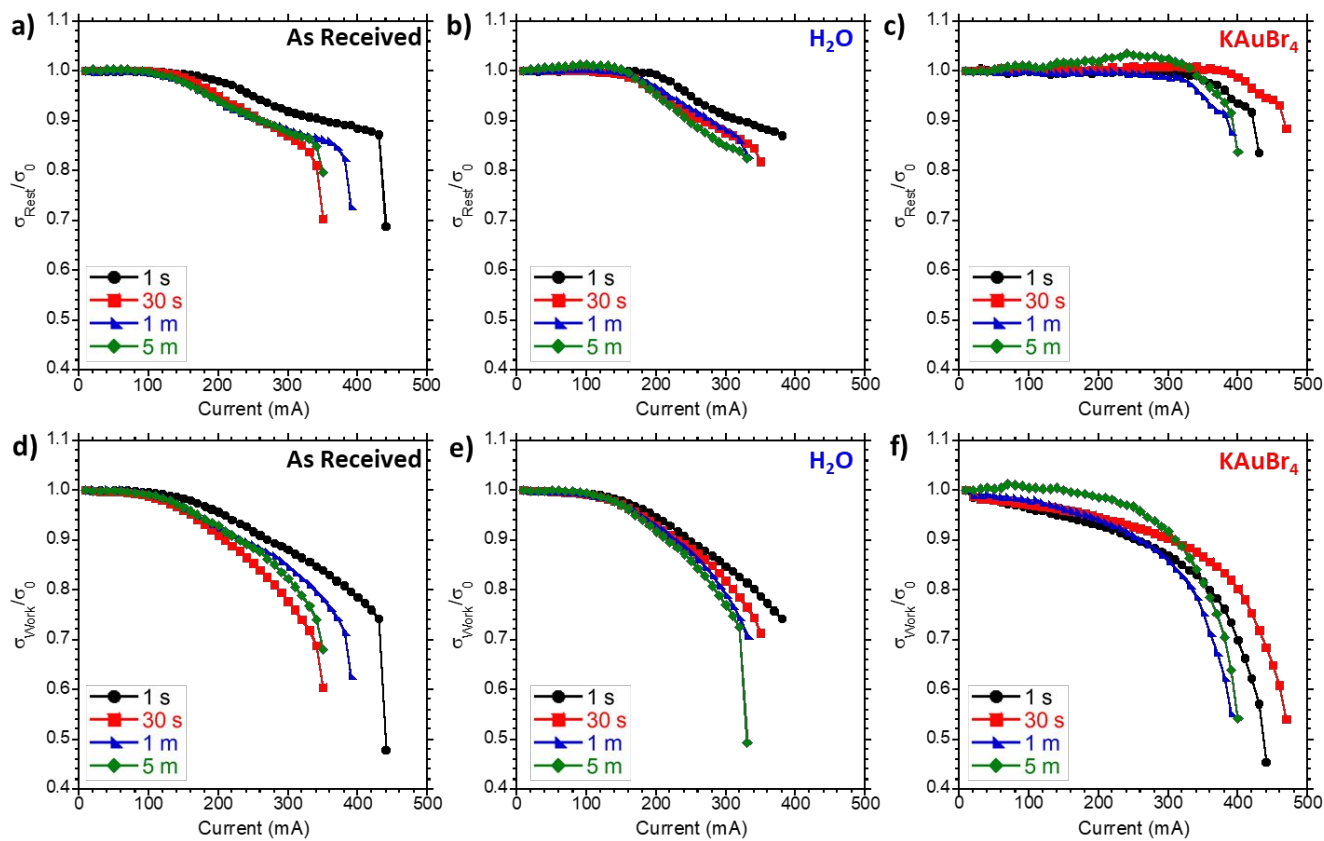

Figure S3: Relative change in resting and working conductivities for as-received, H<sub>2</sub>O-densified, and KAuBr<sub>4</sub>-densified CNT yarns with varying current “on” step times.

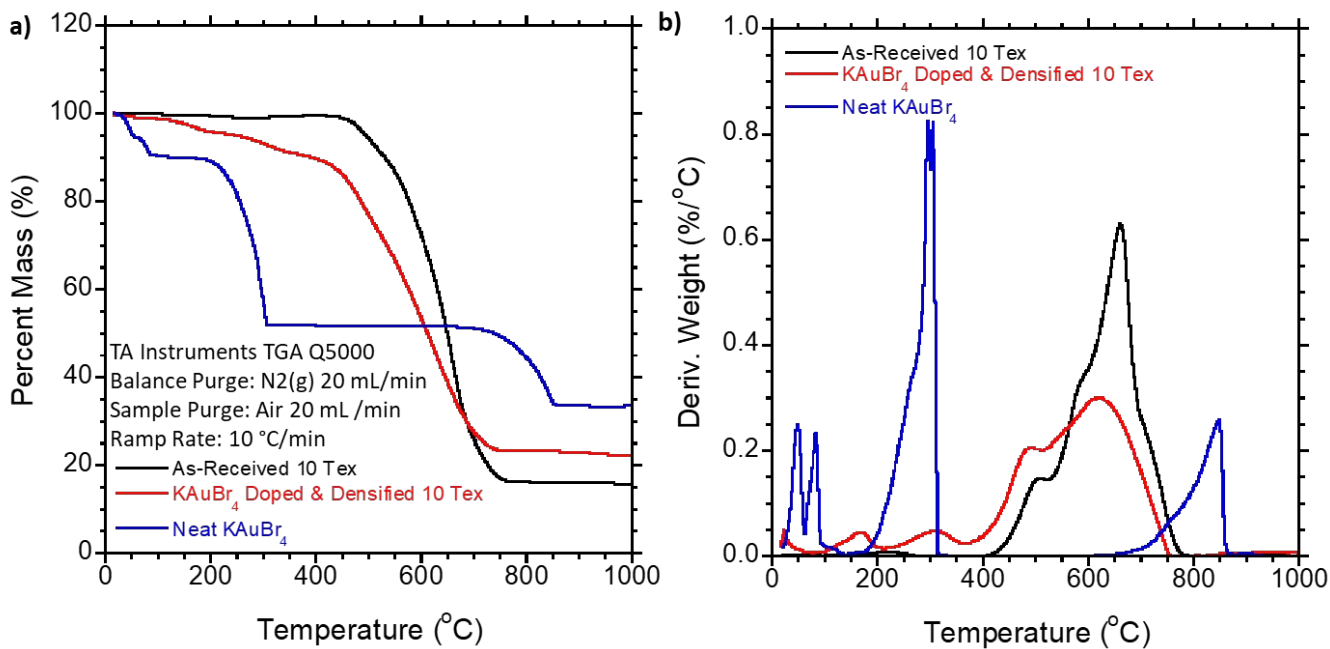

Figure S4: Thermogravimetric analysis of as-received and KAuBr<sub>4</sub>-densified CNT yarns compared to neat KAuBr<sub>4</sub> solids.

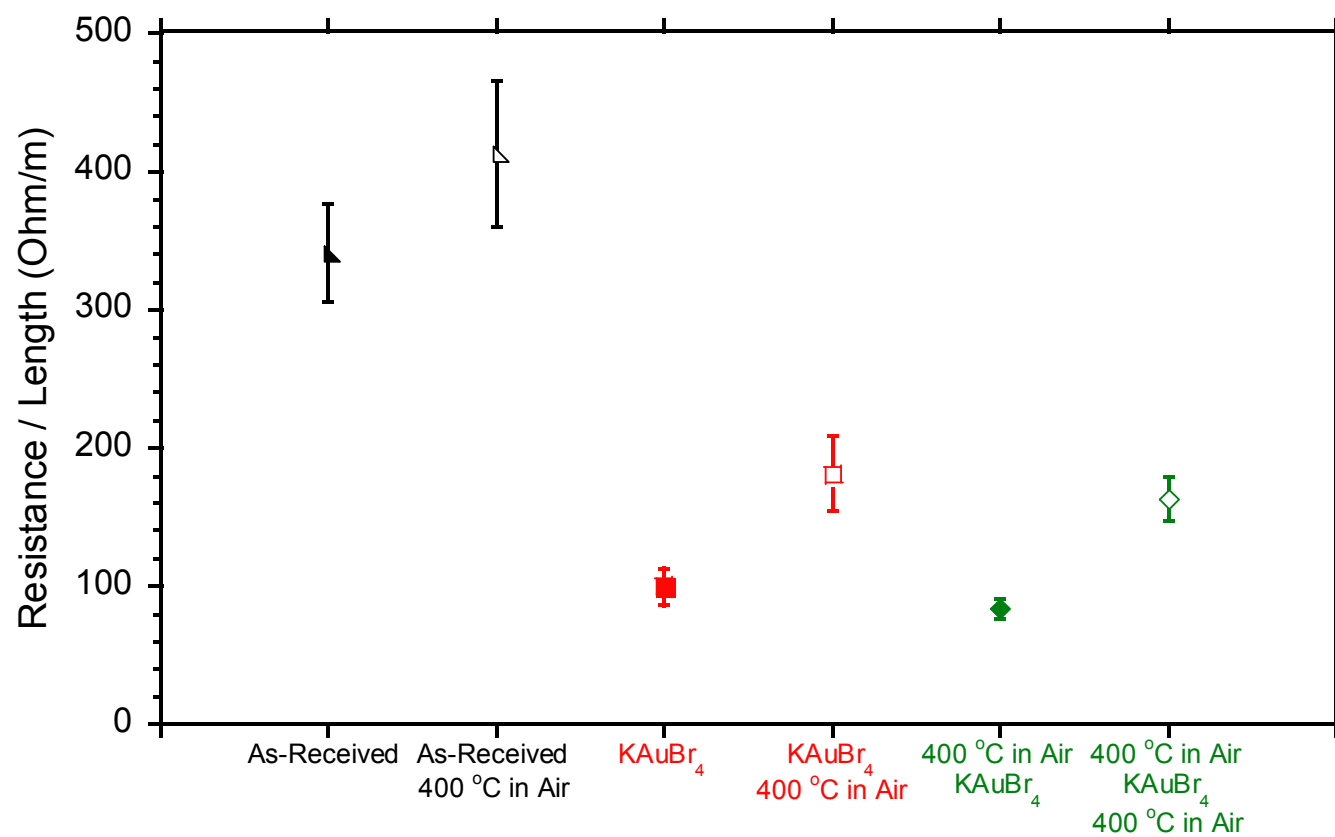

Figure S5: Resistance per length of CNT yarn samples for thermal stability study taken at room temperature.

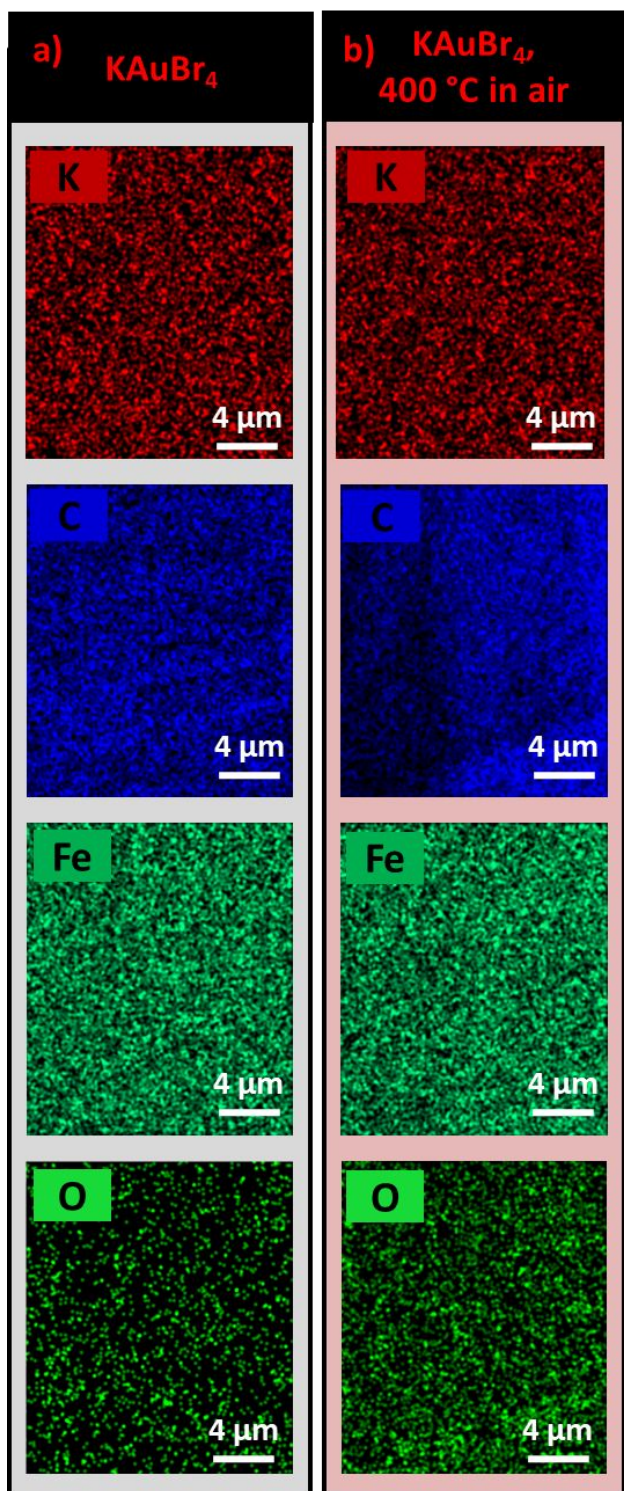

Figure S6: Elemental spatial analysis from EDX spectroscopy of potassium, carbon, iron, and oxygen for KAuBr<sub>4</sub>-doped CNT samples a) before (KAuBr<sub>4</sub> - ■) and b) after thermal oxidation to 400 °C (KAuBr<sub>4</sub>, - 400 °C in air - □).
